# Supplementary material for: An Asian case of combined 17α-hydroxylase/17,20-lyase deficiency due to homozygous p.R96Q mutation: A case report and review of the literature
Source: PubMed Central journal article supplement (PMC9627194; doi:10.3389/fendo.2022.989447), 2022-10-19
Supplement: Table_1.pdf [file Table_1.pdf]

Supplementary table 1. The reference range of each steroid hormones tested by LC-MS/MS.

| Item                          | Result | Reference range |
|-------------------------------|--------|-----------------|
| Pregnenolone(ng/ml)           | 6.51   | 0.07-1.88       |
| Progesterone(ng/ml)           | 9      | <0.2            |
| 11-Deoxycorticosterone(ng/ml) | 0.1    | ≤0.23           |
| Corticosterone(ng/ml)         | 54.2   | 0.6-12.93       |
| Aldosterone(ng/ml)            | 0.02   | 0.013-0.16      |
| 17-OH Pregnenolone(ng/ml)     | 0.81   | 0.31-4.55       |
| 17-OH Progesterone(ng/ml)     | 0.14   | <0.8            |
| 11-Deoxycortisol(ng/ml)       | 0.38   | <1.07           |
| Cortisol(ng/ml)               | 0.5    | 60-260          |
| DHEA(ng/ml)                   | 0.37   | 1.02-11.85      |
| Androstenedione(ng/ml)        | 0.02   | 0.35-2.5        |
| Estrone(ng/ml)                | 0.02   | 0.01-0.138      |
| Testosterone(ng/ml)           | 0.03   | 0.02-0.45       |
| Estradiol(ng/ml)              | 0.018  | 0.013-0.166     |
